# Supplementary material
Source: publisher figshare collection journal article supplement (https://tandf.figshare.com/ndownloader/files/13084124)
Supplement: Supplementary file 1 [file 13084124]

Figure S1. Patient selection process

130 patients were registered

20 were ineligible

16 multiple gestations

1 placental abruption

3 history of conization

110 patients were eligible

29 were AFS positive (26.4%)

81 were AFS negative (73.6%)
